# Supplementary material for: An acidic pH independent piperazine–TPE AIEgen as a unique bioprobe for lysosome tracing
Source: PubMed Central journal article supplement (PMC5848814; doi:10.1039/c7sc03515b), 2017-09-18
Supplement: SC-008-C7SC03515B-s001.pdf [file SC-008-C7SC03515B-s001.pdf]

## Electronic Supplementary Information (ESI)

1. NMR spectra of **PIP-TPE** and VT-NMR spectra of **protonated PIP-TPE**
2. Single Crystal X-ray Crystallography of **PIP-TPE**
3. Confocal images of **PIP-TPE** in H<sub>2</sub>O
4. Fluorescence quantum yields of **PIP-TPE** in MeOH with different fractions of glycerol
5. Particle sizes of **PIP-TPE** in aqueous buffer solutions
6. Viscosity measurement
7. Live cell and Fixed cell fluorescent imaging of **PIP-TPE** in Hela cells
8. MTT of **PIP-TPE**
9. Photostability of **PIP-TPE**
10. Theoretical calculations of **PIP-TPE**, protonated **PIP-TPE** and **PIP-TPE** in bulk

# 1. NMR spectra of PIP-TPE and VT-NMR spectra of protonated PIP-TPE

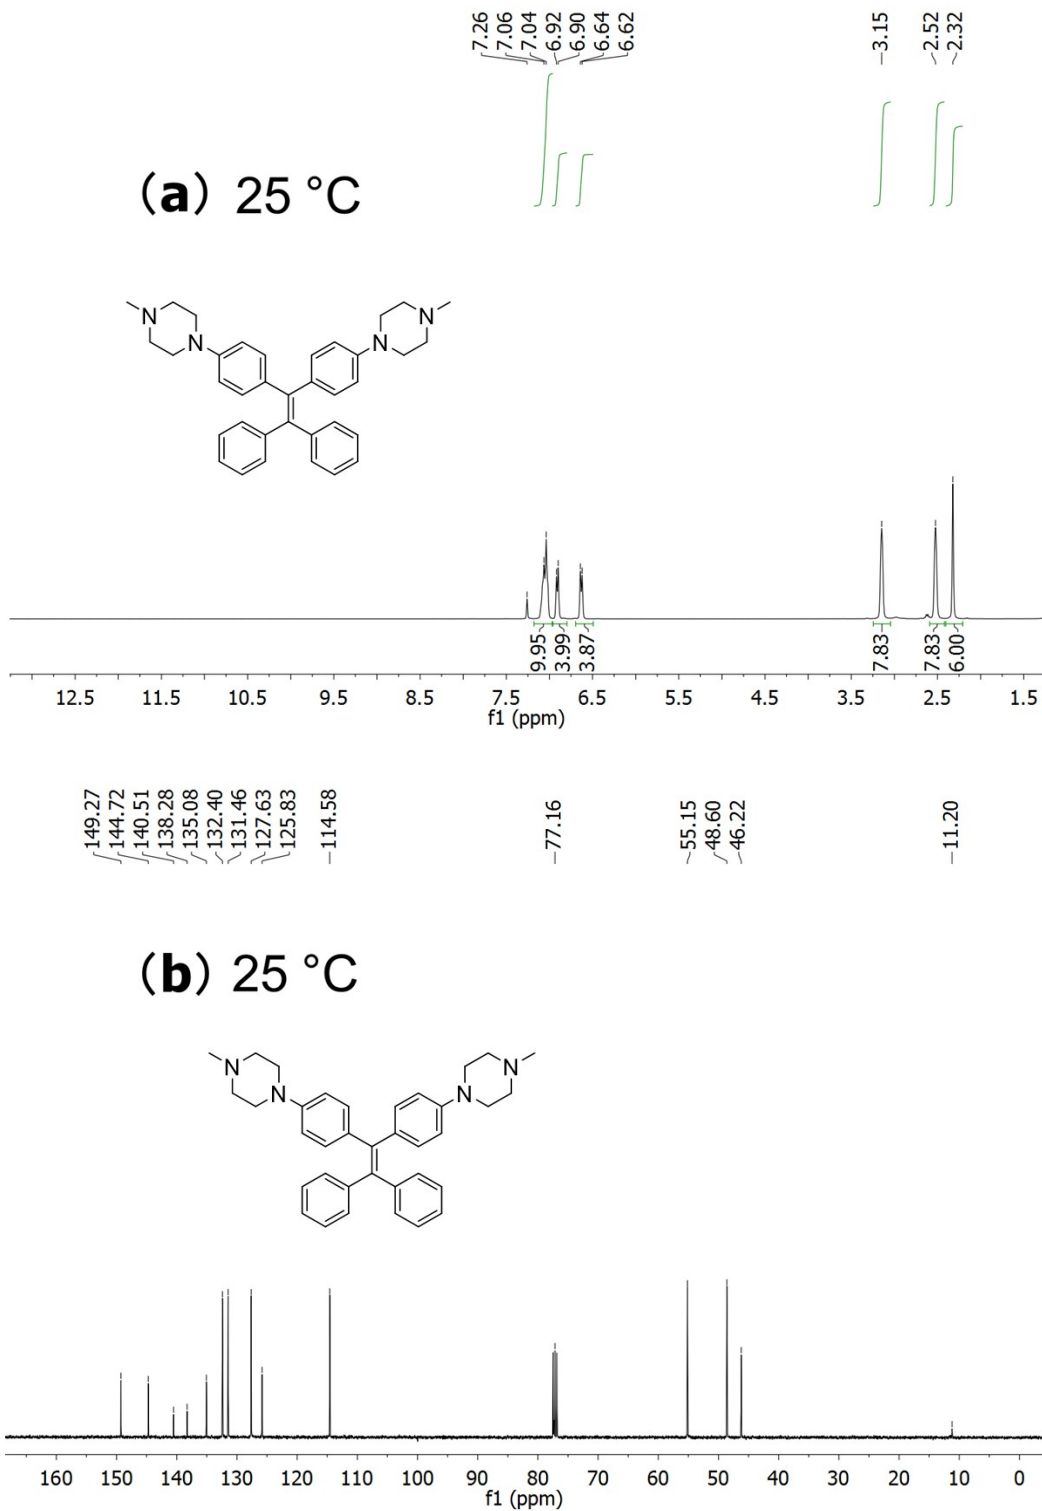

**Figure S1** (a)  $^1\text{H}$ -NMR (400.132 MHz,  $\text{CDCl}_3/\text{TMS}$ ) and (b)  $^{13}\text{C}$ -NMR (100.632 MHz,  $\text{CDCl}_3/\text{TMS}$ ) of PIP-TPE

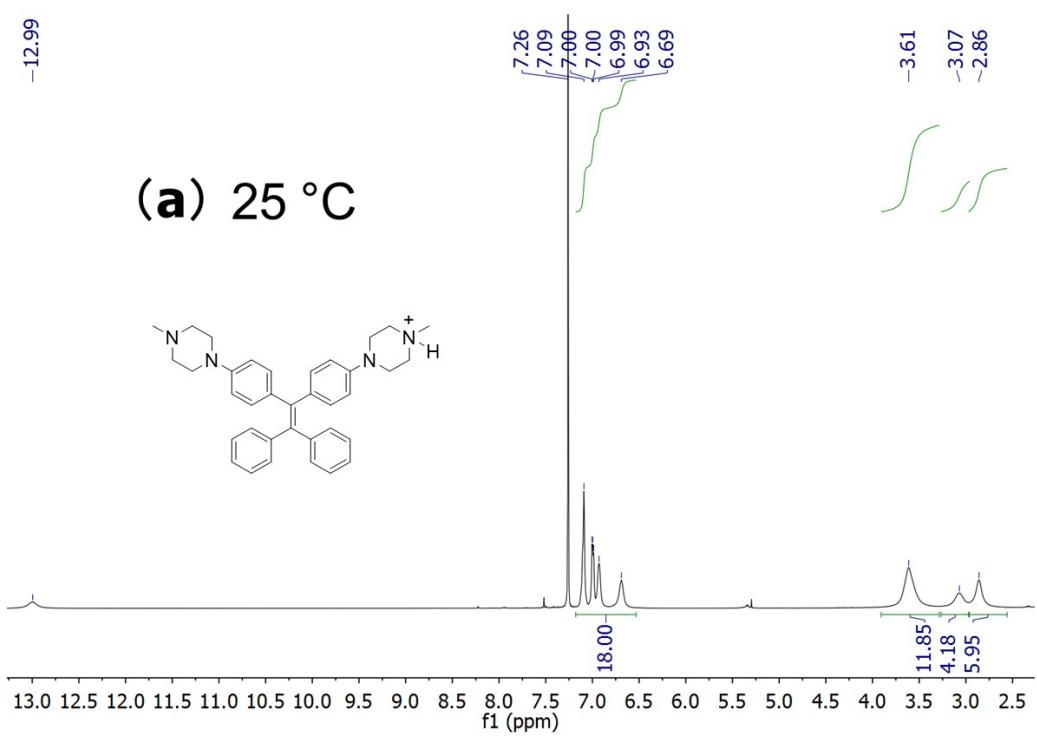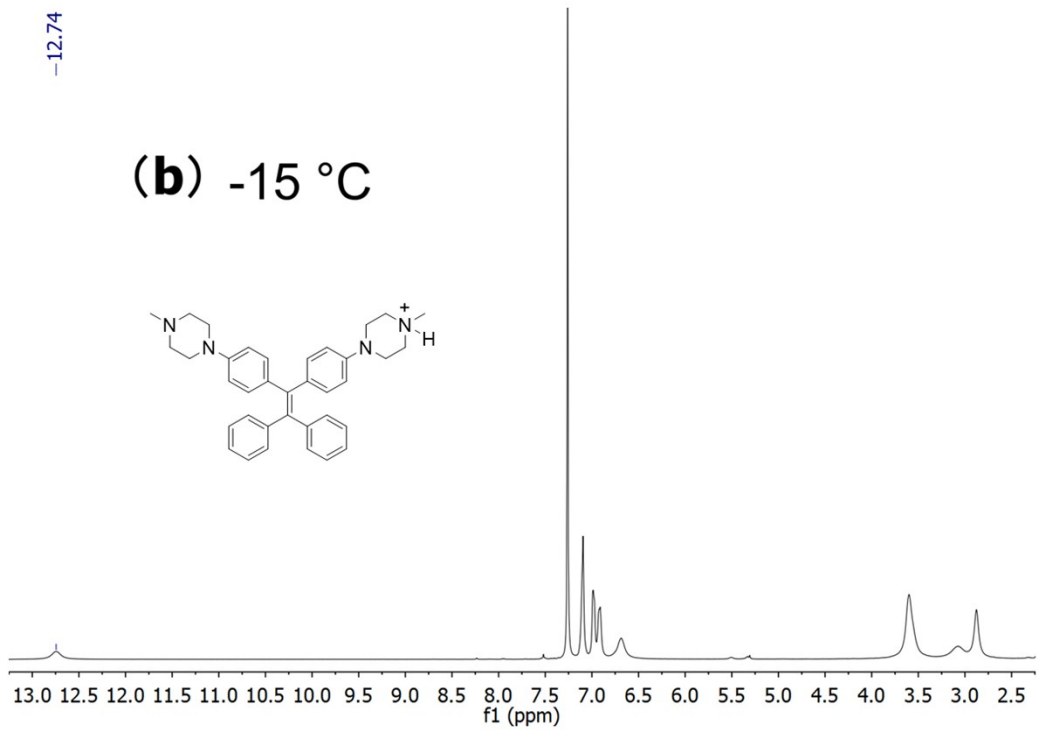

-12.59

3.62  
3.59  
3.55  
3.04  
2.88

(c) -35 °C

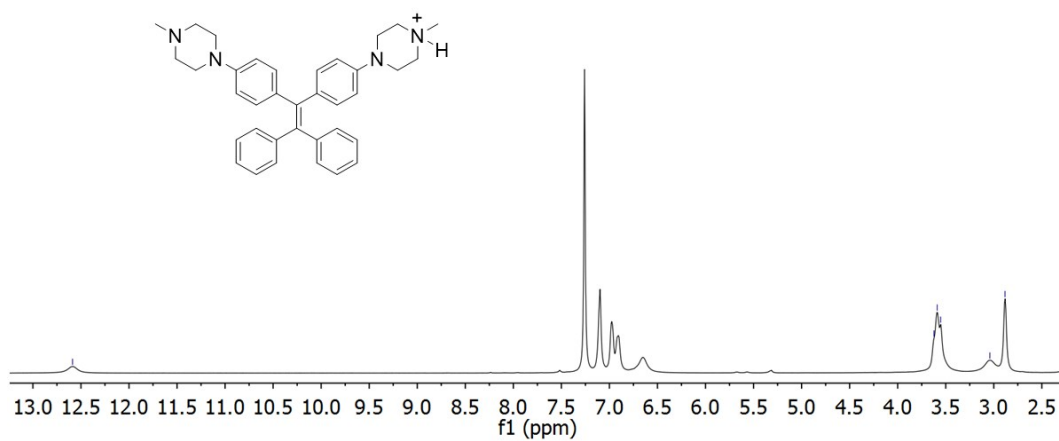

-12.46

3.64  
3.61  
3.56  
3.52  
3.04  
2.90

(d) -56 °C

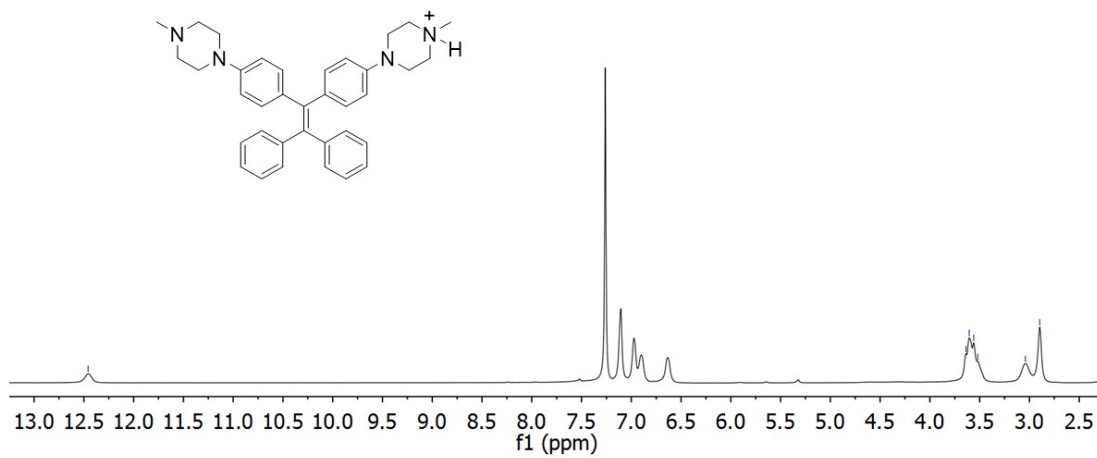

Figure S2 VT-<sup>1</sup>H NMR of protonated PIP-TPE (400.132 MHz, CDCl<sub>3</sub>)

## 2. Single Crystal X-ray Crystallography of PIP-TPE

**Table S1** The crystallographic details of the compound **PIP-TPE**

| Compound                                     | <b>PIP-TPE</b>                                 |
|----------------------------------------------|------------------------------------------------|
| CCDC No.                                     | 1555412                                        |
| empirical formula                            | C <sub>36</sub> H <sub>40</sub> N <sub>4</sub> |
| formula weight                               | 528.72                                         |
| crystal dimensions, mm                       | 0.25 × 0.1 × 0.08                              |
| crystal system                               | monoclinic                                     |
| space group                                  | <i>P2<sub>1</sub>/c</i>                        |
| a/Å                                          | 13.1123(13)                                    |
| b/Å                                          | 20.5840(16)                                    |
| c/Å                                          | 11.2600(9)                                     |
| α/°                                          | 90                                             |
| β/°                                          | 99.391(9)                                      |
| γ/°                                          | 90                                             |
| Volume/Å <sup>3</sup>                        | 2998.4(5)                                      |
| Z                                            | 4                                              |
| ρ <sub>calc</sub> , mg/mm <sup>3</sup>       | 1.171                                          |
| F(000)                                       | 1136.0                                         |
| λ/ Å                                         | MoKα (λ = 0.71073)                             |
| μ/mm <sup>-1</sup>                           | 0.069                                          |
| temperature/K                                | 100.00(10)                                     |
| 2θ range for data collection                 | 6.544 to 51.992                                |
| reflections collected                        | 17830                                          |
| independent reflections. (R <sub>int</sub> ) | 5841 (0.1229)                                  |
| data/restraints/parameters                   | 5841/0/363                                     |
| goodness-of-fit on F <sup>2</sup>            | 1.000                                          |
| R <sub>1</sub> ,wR <sub>2</sub> [I>=2σ (I)]  | 0.0679, 0.0990                                 |
| R <sub>1</sub> ,wR <sub>2</sub> [all data]   | 0.1569, 0.1222                                 |
| largest diff. peak/hole / e Å <sup>-3</sup>  | 0.20/-0.23                                     |

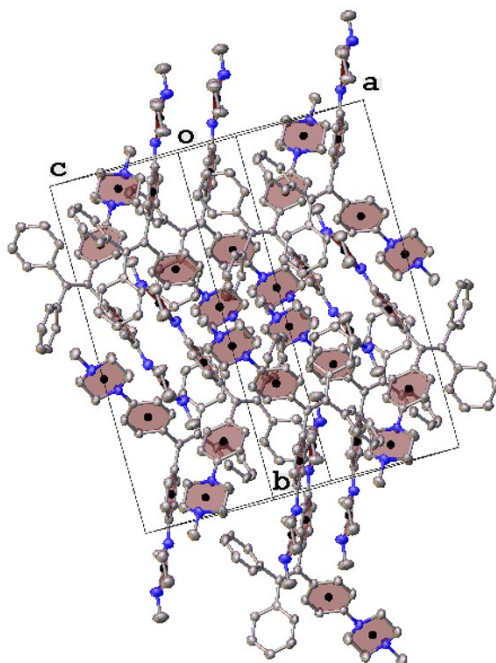

**Figure S3** Crystal packing of **PIP-TPE** (piperazines and their neighboring phenyls are highlighted in red)

### 3. Confocal images of PIP-TPE in H<sub>2</sub>O

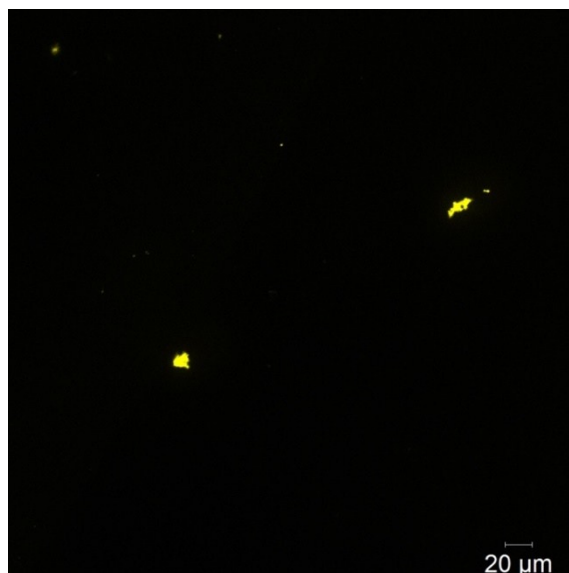

**Figure S4** Confocal image of **PIP-TPE** as amorphous particles in H<sub>2</sub>O (50 μM), Scale bar = 20 μm.

#### 4. Fluorescence quantum yields of PIP-TPE in MeOH with different fractions of glycerol

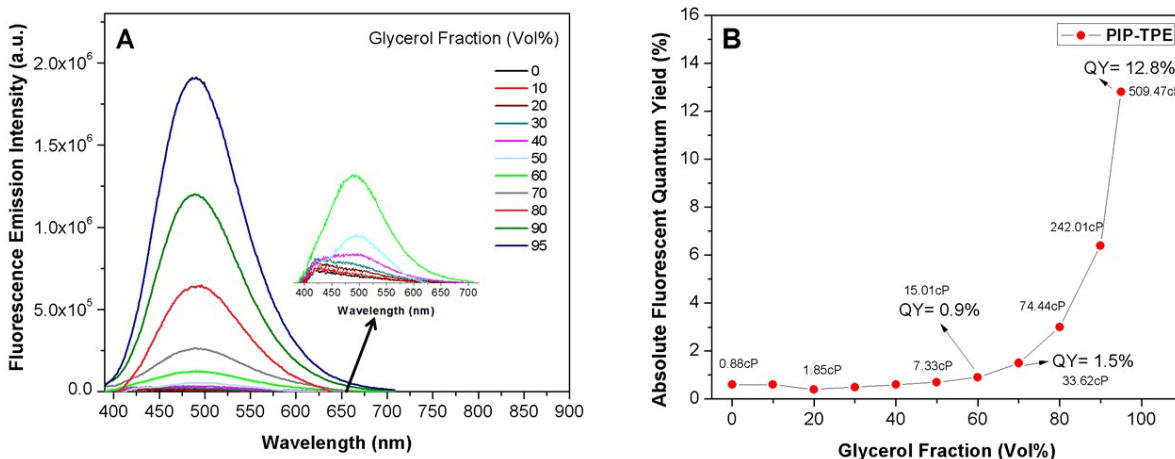

**Figure S5** Photoluminescent intensity PL (A) and absolute fluorescence quantum yields  $\Phi_{PL}$  (B) of PIP-TPE ( $10^{-5}M$ ) in MeOH with different fractions of glycerol; all data were collected under  $\lambda_{ex} = 360nm$  at  $25^\circ C$ .

#### 5. Particle sizes of PIP-TPE in aqueous buffer solutions

The Particle sizes of PIP-TPE in aqueous buffer solutions were measured on a Zeta potential analyzer (Brookhaven, ZETAPLUS).

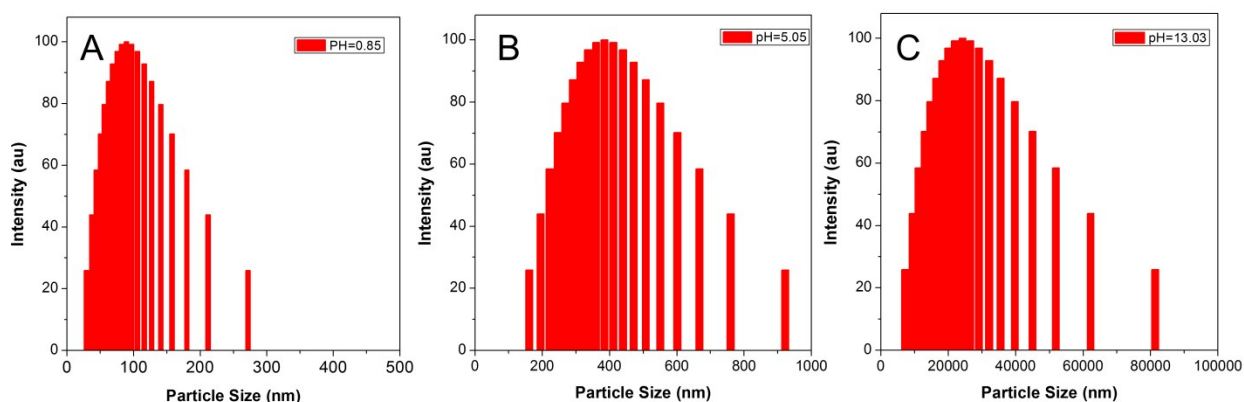

**Figure S6** The particle sizes of PIP-TPE in aqueous buffer solutions of pH 0.85, 5.05 and 13.03

( $0.8 \times 10^{-5} \text{M}$ ) are 89 nm, 385 nm and  $24.2 \mu\text{m}$ , respectively.

## 6. Viscosity measurement

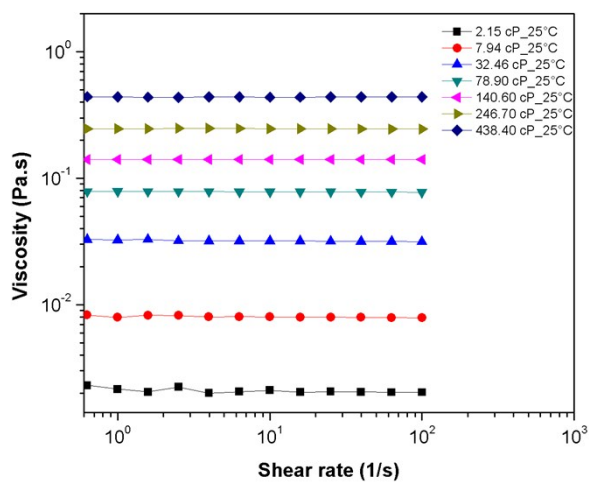

**Figure S7** The viscosity of aqueous buffer-glycerol mixtures at  $25 \pm 0.5^\circ\text{C}$ .

## 7. Live cell and Fixed cell fluorescent imaging of PIP-TPE in HeLa cells

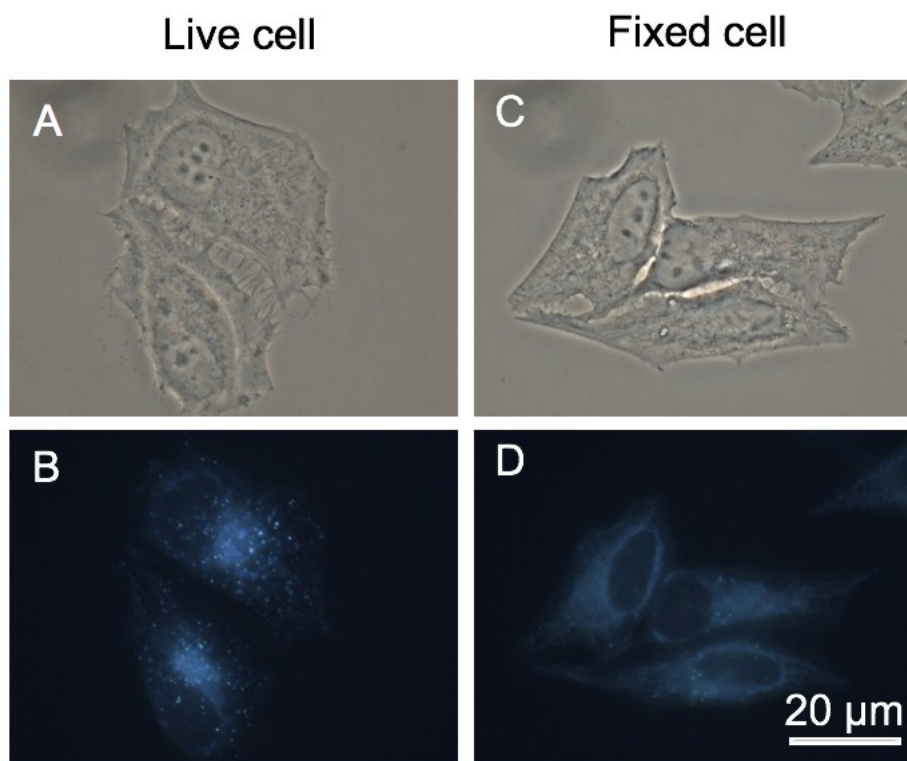



**Figure S8** (A and C) Bright field and (B and D) fluorescent images of HeLa cells incubated with 1  $\mu\text{M}$  **PIP-TPE** for 15min then (A-B) without treatment or (C-D) with 2mL 4% PFA (paraformaldehyde) treatment for 15 min. Excitation wavelength: 330-385 nm; Scale bar = 20  $\mu\text{m}$ .

## 8. MTT of PIP-TPE

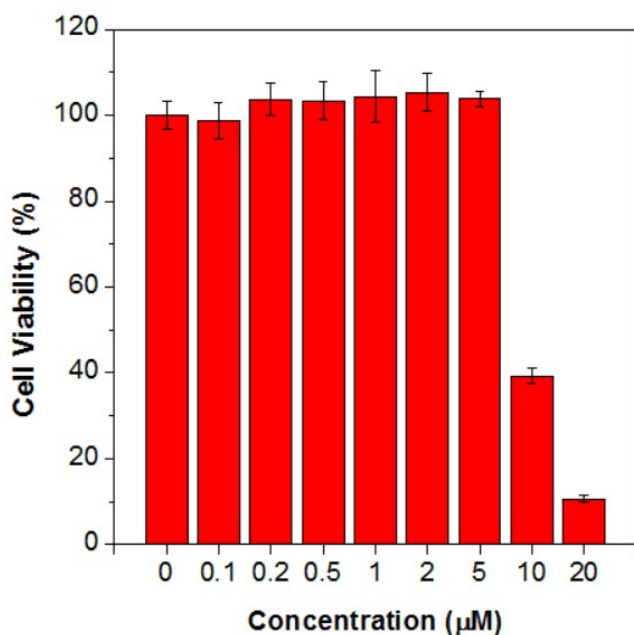

**Figure S9** Cell viability of HeLa cells after incubation with different concentrations of **PIP-TPE**.

## 9. Photostability of PIP-TPE

For the photostability test, the cells were imaged by a confocal microscope (Zeiss Laser Scanning Confocal Microscope; LSM7 DUO) using ZEN 2009 software (Carl Zeiss). **PIP-TPE** was excited at 405 nm (2% laser power) and LysoTracker Red was excited at 560 nm (2% laser power).

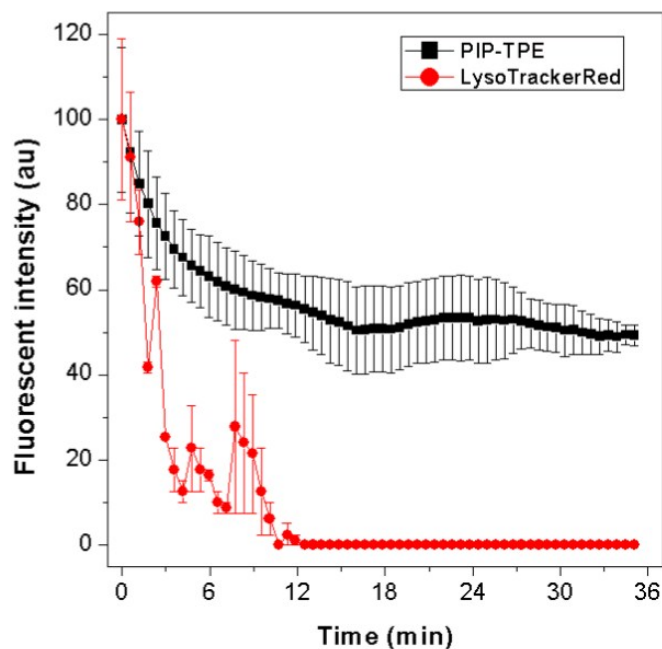

**Figure S10** The photostability of **PIP-TPE** and LysoTracker Red

### 10. Theoretical calculations of **PIP-TPE**, protonated **PIP-TPE** and **PIP-TPE** in bulk

Quantum mechanical calculations for the **PIP-TPE** single molecule in solution were performed at the DFT level of theory using B3LYP functional<sup>[1-4]</sup> and 6-31G(d) basis set as implemented in the D0.1 version of the Gaussian 09 software package.<sup>[5]</sup> The bulk solvent (water) effect has been modeled using the polarizable continuum model (PCM).<sup>[6]</sup> Possible static correlations in the system were modeled using Grimme's density functional empirical dispersion corrections as implemented in the D0.1 version of the Gaussian 09.<sup>[7]</sup> The equilibrium solvation method was employed for geometry optimization and vibrational frequency calculations. The solution-phase Hessian of  $S_0$  was evaluated analytically at the DFT level indicated above and had no negative eigenvalues.

The photophysical properties of **PIP-TPE** in the aggregated state were analyzed using ONIOM(QM:MM) approach, an integrated quantum mechanics: molecular mechanics (QM:MM) method.<sup>[8-11]</sup> In the two-layer ONIOM calculation the system was divided into two parts, a selected centrally located **PIP-TPE** molecule was treated by a DFT/TD-DFT (QM) method using B3LYP functional<sup>[2-4, 12]</sup> while the packing surroundings in the crystal (40 **PIP-TPE** molecules) were treated by a low-level method, molecular mechanics (MM) method, the

Universal Force Field (UFF).<sup>[13]</sup> Geometry optimization, vibrational frequency and excited state calculations were performed using the 6-31G(d) basis set as implemented in the D0.1 version of Gaussian 09 software package. The solid-phase Hessian of  $S_0$  was evaluated analytically at the DFT level, while that of  $S_1$  was calculated numerically at the TD-DFT level. The electrostatic interactions in the model were calculated semiclassically incorporating the MM charges into the QM Hamiltonian (electronic embedding).<sup>[11,14]</sup> In our QM/MM model we neglect possible intermolecular excitonic couplings and assume that the intramolecular motions dominate the photophysical process.

During the QM/MM simulations, only the central **PIP-TPE** (QM) molecule was active for optimization, while all the surrounding **PIP-TPE** (MM) molecules remained rigid. No symmetry constraints were imposed during the optimizations in both solution and solid phases. The above PCM and QM/MM methods have been shown to be successful in dealing with varieties of AIEgens with both structure and excited-state decay rates.<sup>[15-16]</sup>

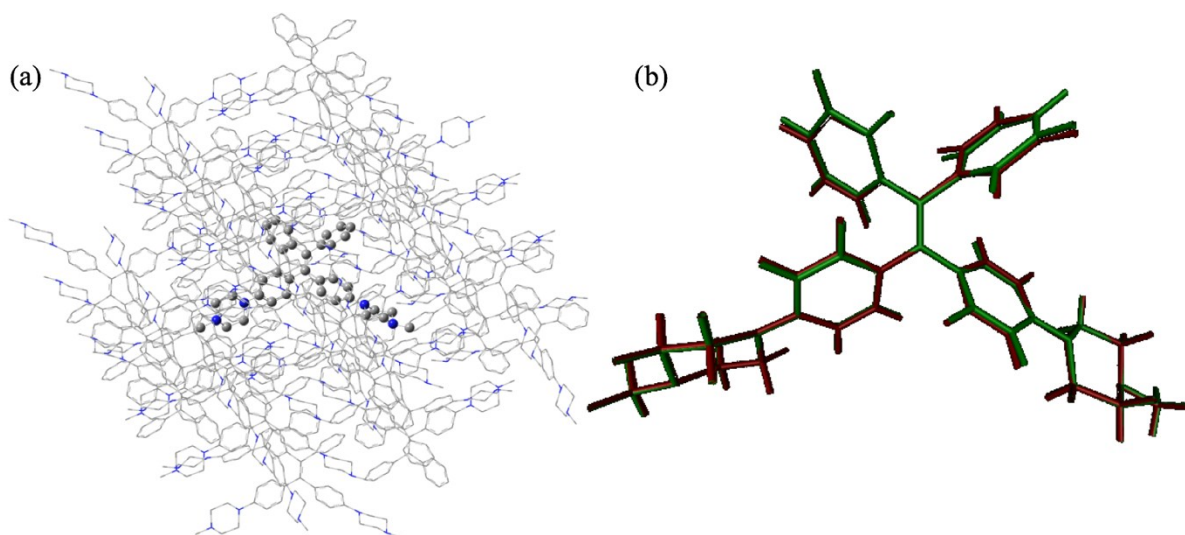

**Figure S11** (a) Optimized 40-molecule **PIP-TPE** cluster with **PIP-TPE**<sub>(bulk)</sub> molecule in the ground state calculated using ONIOM QM:MM model of with the high-level part of model shown using ball-and-stick representation, and the low-level part of the model using wire representation; (b) overlay of the optimized ground state ( $S_0$ ) and first excited state ( $S_1$ ) structures of **PIP-TPE**<sub>(bulk)</sub> (green =  $S_0$ ; red =  $S_1$ ).

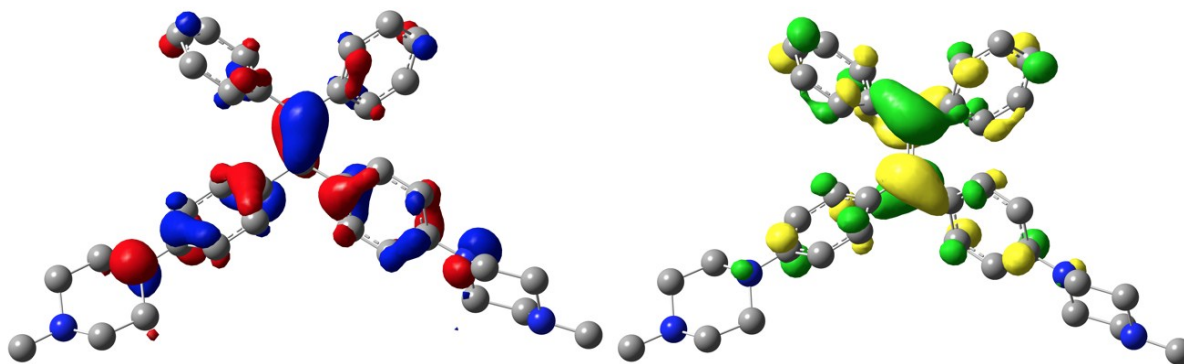

**Figure S12** The HOMO (left) and LUMO (right) in **PIP-TPE**. Hydrogen atoms are omitted for clarity. HOMO and LUMO are depicted at *iso* value of 0.04.

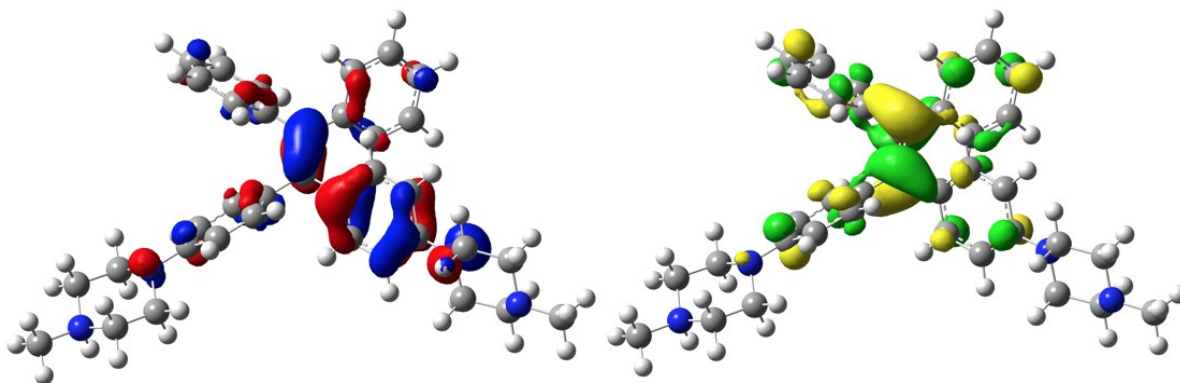

**Figure S13** The HOMO (left) and LUMO (right) of **PIP-TPEH<sup>+</sup><sub>(soln)</sub>**; HOMO and LUMO are depicted at *iso* value of 0.04.

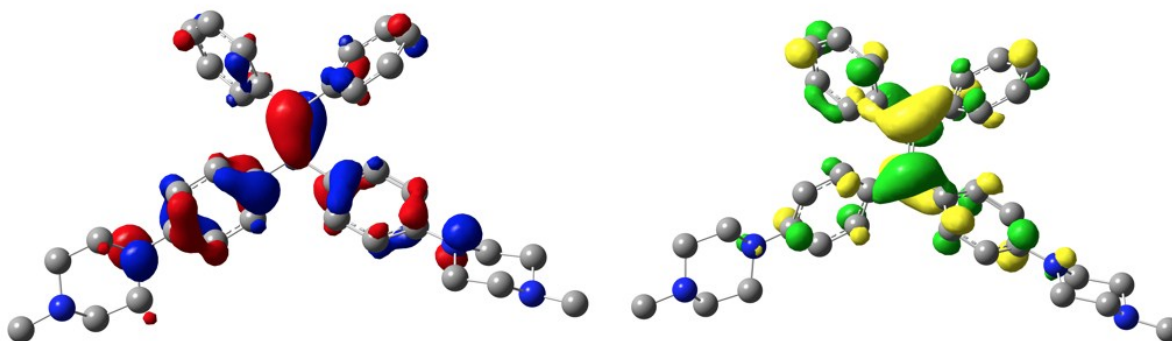

**Figure S14** The HOMO (left) and LUMO (right) of **PIP-TPE<sub>(bulk)</sub>**; Hydrogen atoms are omitted for clarity; HOMO and LUMO are depicted at *iso* value of 0.04.

## Optimized Geometries

### (1) $S_0$ geometry of PIP-TPE:

|   |           |           |           |
|---|-----------|-----------|-----------|
| H | 8.553326  | -4.939947 | -0.583412 |
| C | 8.441546  | -4.156319 | 0.174012  |
| H | 8.553326  | -4.939947 | -0.583412 |
| H | 8.738111  | -4.570623 | 1.143887  |
| H | 9.140668  | -3.334923 | -0.076379 |
| N | 7.051193  | -3.721223 | 0.230072  |
| C | 6.846716  | -2.707599 | 1.264005  |
| C | 5.374553  | -2.316616 | 1.346374  |
| N | 4.892658  | -1.828556 | 0.044673  |
| C | 3.672087  | -1.125318 | 0.036358  |
| C | 3.483932  | -0.031768 | 0.910047  |
| C | 2.309771  | 0.706892  | 0.894377  |
| C | 1.261041  | 0.406145  | 0.005610  |
| C | -0.004760 | 1.189077  | -0.003464 |
| C | -0.018872 | 2.556911  | 0.003193  |
| C | 1.199243  | 3.370309  | -0.278158 |
| C | 2.008899  | 3.100925  | -1.395756 |
| H | 1.748290  | 2.272735  | -2.047618 |
| C | 3.135150  | 3.876037  | -1.668507 |
| H | 3.744634  | 3.651835  | -2.540114 |
| C | 3.476018  | 4.941604  | -0.830027 |
| H | 4.354470  | 5.545305  | -1.041287 |
| C | 2.673046  | 5.230187  | 0.276998  |
| H | 2.926803  | 6.058516  | 0.933384  |
| C | 1.541667  | 4.458587  | 0.543421  |
| H | 0.916399  | 4.692071  | 1.400792  |
| C | -1.250934 | 3.345466  | 0.294852  |
| C | -2.052951 | 3.051673  | 1.411873  |
| H | -1.777235 | 2.221207  | 2.054668  |
| C | -3.190711 | 3.805684  | 1.695555  |
| H | -3.794027 | 3.562666  | 2.566421  |
| C | -3.551117 | 4.874334  | 0.869098  |
| H | -4.438546 | 5.461588  | 1.089019  |
| C | -2.755955 | 5.187175  | -0.236873 |
| H | -3.024681 | 6.018110  | -0.883952 |
| C | -1.613107 | 4.436525  | -0.514296 |
| H | -0.994251 | 4.689026  | -1.370958 |
| C | -1.252163 | 0.379281  | -0.018057 |

|   |           |           |           |
|---|-----------|-----------|-----------|
| C | -1.401656 | -0.740425 | 0.821281  |
| H | -0.597579 | -1.002971 | 1.503254  |
| C | -2.563251 | -1.499963 | 0.822691  |
| H | -2.651614 | -2.322771 | 1.524927  |
| C | -3.635588 | -1.198418 | -0.046075 |
| C | -3.474027 | -0.098488 | -0.913006 |
| H | -4.245300 | 0.154413  | -1.631064 |
| C | -2.312813 | 0.670171  | -0.887857 |
| H | -2.221972 | 1.511051  | -1.568871 |
| N | -4.818729 | -1.958166 | 0.002377  |
| C | -5.960484 | -1.509545 | -0.792985 |
| H | -5.805736 | -1.707138 | -1.868555 |
| H | -6.087272 | -0.431432 | -0.661513 |
| C | -7.238633 | -2.206476 | -0.328006 |
| H | -7.472130 | -1.874804 | 0.703640  |
| H | -8.068116 | -1.892289 | -0.971906 |
| N | -7.103251 | -3.659892 | -0.403443 |
| C | -8.339867 | -4.332307 | -0.023747 |
| H | -8.216161 | -5.416319 | -0.123113 |
| H | -9.151268 | -4.016327 | -0.688596 |
| H | -8.646079 | -4.115830 | 1.018108  |
| C | -5.979969 | -4.089850 | 0.428038  |
| H | -5.870370 | -5.177273 | 0.343959  |
| H | -6.150549 | -3.850597 | 1.496917  |
| C | -4.687603 | -3.422388 | -0.031993 |
| H | -3.872269 | -3.740094 | 0.618682  |
| H | -4.450487 | -3.757665 | -1.056803 |
| C | 1.441538  | -0.691755 | -0.847609 |
| C | 2.617120  | -1.440787 | -0.842246 |
| H | 2.696321  | -2.285604 | -1.516523 |
| H | 0.643174  | -0.969524 | -1.530537 |
| H | 2.201977  | 1.546788  | 1.573930  |
| H | 4.277232  | 0.253970  | 1.593734  |
| C | 5.121309  | -2.817040 | -1.007973 |
| C | 6.598984  | -3.202592 | -1.059808 |
| H | 6.737225  | -3.977225 | -1.822831 |
| H | 7.190359  | -2.317834 | -1.369918 |
| H | 4.840260  | -2.383915 | -1.972172 |
| H | 4.512722  | -3.725379 | -0.850842 |
| H | 4.783092  | -3.192818 | 1.664914  |
| H | 5.253407  | -1.540458 | 2.103174  |
| H | 7.452675  | -1.800133 | 1.068933  |
| H | 7.162448  | -3.116505 | 2.230820  |

**(2) S<sub>0</sub> geometry of PIP-TPEH<sup>+</sup><sub>(soln)</sub>:**

a. UV-vis calculation:

Excited State 1: Singlet-A 3.2557 eV 380.82 nm f=0.4960 <S\*\*2>=0.000

142 ->143 0.70477

b. Optimized Geometry

|   |           |           |           |
|---|-----------|-----------|-----------|
| H | 8.430775  | -5.100743 | -0.582951 |
| C | 8.366107  | -4.284555 | 0.144997  |
| H | 8.430775  | -5.100743 | -0.582951 |
| H | 8.684288  | -4.667993 | 1.120683  |
| H | 9.078285  | -3.494181 | -0.161893 |
| N | 6.990678  | -3.808554 | 0.229075  |
| C | 6.847952  | -2.748994 | 1.226438  |
| C | 5.389325  | -2.318070 | 1.344303  |
| N | 4.870335  | -1.872133 | 0.041598  |
| C | 3.664477  | -1.145249 | 0.045821  |
| C | 3.516133  | -0.026188 | 0.895255  |
| C | 2.356132  | 0.734601  | 0.887010  |
| C | 1.281463  | 0.431941  | 0.030190  |
| C | 0.029691  | 1.235521  | 0.024821  |
| C | 0.026084  | 2.602139  | 0.012252  |
| C | 1.249340  | 3.403646  | -0.280390 |
| C | 2.052776  | 3.117116  | -1.397934 |
| H | 1.784499  | 2.284055  | -2.040442 |
| C | 3.182644  | 3.882655  | -1.682471 |
| H | 3.787562  | 3.646259  | -2.553974 |
| C | 3.533190  | 4.953978  | -0.855388 |
| H | 4.414676  | 5.549911  | -1.075754 |
| C | 2.736577  | 5.258619  | 0.251856  |
| H | 2.998199  | 6.091640  | 0.899059  |
| C | 1.601009  | 4.497231  | 0.529717  |
| H | 0.980001  | 4.743223  | 1.386680  |
| C | -1.202577 | 3.400995  | 0.289387  |
| C | -2.009387 | 3.127376  | 1.407841  |
| H | -1.738120 | 2.307813  | 2.066235  |
| C | -3.145845 | 3.889641  | 1.674936  |
| H | -3.753093 | 3.662940  | 2.547408  |
| C | -3.499296 | 4.945695  | 0.829863  |
| H | -4.385499 | 5.539430  | 1.036836  |
| C | -2.698877 | 5.238431  | -0.277999 |
| H | -2.962506 | 6.059752  | -0.939205 |
| C | -1.557376 | 4.480141  | -0.538810 |
| H | -0.934127 | 4.716645  | -1.396784 |

|   |           |           |           |
|---|-----------|-----------|-----------|
| C | -1.229763 | 0.440210  | 0.025277  |
| C | -1.407516 | -0.634139 | 0.915473  |
| H | -0.625058 | -0.864851 | 1.632756  |
| C | -2.574237 | -1.386935 | 0.917829  |
| H | -2.696987 | -2.174276 | 1.655514  |
| C | -3.604643 | -1.125027 | -0.005848 |
| C | -3.423606 | -0.069383 | -0.915011 |
| H | -4.173211 | 0.153011  | -1.665937 |
| C | -2.261087 | 0.699625  | -0.887100 |
| H | -2.145778 | 1.510923  | -1.599209 |
| N | -4.786441 | -1.910546 | 0.031843  |
| C | -5.917992 | -1.465603 | -0.772626 |
| H | -5.762457 | -1.638571 | -1.852378 |
| H | -6.071693 | -0.393338 | -0.629503 |
| C | -7.198424 | -2.158061 | -0.318793 |
| H | -7.430160 | -1.917192 | 0.720543  |
| H | -8.040879 | -1.884155 | -0.955818 |
| N | -7.049511 | -3.661432 | -0.385266 |
| C | -8.300950 | -4.373809 | 0.037312  |
| H | -8.145122 | -5.446596 | -0.078271 |
| H | -9.121034 | -4.038611 | -0.598105 |
| H | -8.501252 | -4.127640 | 1.080233  |
| C | -5.841823 | -4.097803 | 0.413283  |
| H | -5.736720 | -5.176683 | 0.289093  |
| H | -6.059096 | -3.865451 | 1.457831  |
| C | -4.602114 | -3.361073 | -0.072973 |
| H | -3.766341 | -3.684184 | 0.547487  |
| H | -4.371707 | -3.660302 | -1.111032 |
| H | -6.873001 | -3.910146 | -1.365899 |
| C | 1.422017  | -0.691176 | -0.797784 |
| C | 2.582555  | -1.462552 | -0.799218 |
| H | 2.628522  | -2.325726 | -1.452737 |
| H | 0.603817  | -0.971663 | -1.455622 |
| H | 2.280345  | 1.592527  | 1.548006  |
| H | 4.328878  | 0.262308  | 1.554294  |
| C | 5.043420  | -2.903722 | -0.980254 |
| C | 6.508589  | -3.328583 | -1.064627 |
| H | 6.601642  | -4.135124 | -1.800939 |
| H | 7.111178  | -2.472267 | -1.428364 |
| H | 4.743139  | -2.498808 | -1.950835 |
| H | 4.417887  | -3.789756 | -0.771343 |
| H | 4.789483  | -3.164882 | 1.720913  |
| H | 5.315403  | -1.508729 | 2.071741  |
| H | 7.468135  | -1.865818 | 0.973150  |
| H | 7.187892  | -3.125943 | 2.197975  |



**(3) S<sub>1</sub> geometry of PIP-TPEH<sup>+</sup><sub>(soln)</sub>:**

|   |           |           |           |
|---|-----------|-----------|-----------|
| H | 9.114386  | -4.463417 | -0.073077 |
| C | 9.030758  | -3.415189 | 0.233603  |
| H | 9.114386  | -4.463417 | -0.073077 |
| H | 9.639233  | -3.269667 | 1.132707  |
| H | 9.453397  | -2.786040 | -0.573175 |
| N | 7.637715  | -3.099628 | 0.528635  |
| C | 7.483700  | -1.721453 | 0.989539  |
| C | 6.033477  | -1.447648 | 1.374379  |
| N | 5.125890  | -1.724884 | 0.251735  |
| C | 3.873108  | -1.126990 | 0.215000  |
| C | 3.699270  | 0.229339  | 0.602308  |
| C | 2.471022  | 0.849055  | 0.523085  |
| C | 1.294696  | 0.168521  | 0.085319  |
| C | 0.037681  | 0.858046  | 0.008560  |
| C | 0.041001  | 2.342353  | -0.029324 |
| C | 0.674387  | 2.992084  | -1.150966 |
| C | 0.898003  | 2.278151  | -2.365940 |
| H | 0.537084  | 1.257399  | -2.444702 |
| C | 1.537687  | 2.865443  | -3.449620 |
| H | 1.672824  | 2.292489  | -4.363925 |
| C | 2.009430  | 4.182397  | -3.373894 |
| H | 2.516916  | 4.637048  | -4.219989 |
| C | 1.832800  | 4.897977  | -2.181038 |
| H | 2.220532  | 5.910185  | -2.094043 |
| C | 1.184900  | 4.323708  | -1.095890 |
| H | 1.107382  | 4.883532  | -0.170159 |
| C | -0.611182 | 3.047167  | 1.051825  |
| C | -0.774304 | 2.423425  | 2.322668  |
| H | -0.360383 | 1.430596  | 2.472565  |
| C | -1.424155 | 3.062128  | 3.370161  |
| H | -1.511996 | 2.559083  | 4.330197  |
| C | -1.966464 | 4.343513  | 3.199672  |
| H | -2.481972 | 4.838302  | 4.017959  |
| C | -1.849884 | 4.967617  | 1.950972  |
| H | -2.292238 | 5.948109  | 1.791317  |
| C | -1.191494 | 4.339949  | 0.900505  |
| H | -1.160429 | 4.825417  | -0.069122 |
| C | -1.243532 | 0.189538  | -0.034783 |
| C | -1.484038 | -1.088651 | 0.547168  |
| H | -0.683363 | -1.590416 | 1.079829  |
| C | -2.734744 | -1.677636 | 0.526426  |
| H | -2.879326 | -2.627273 | 1.033434  |
| C | -3.835264 | -1.042828 | -0.090006 |

|   |           |           |           |
|---|-----------|-----------|-----------|
| C | -3.624934 | 0.233900  | -0.647625 |
| H | -4.433778 | 0.762968  | -1.139421 |
| C | -2.375568 | 0.834353  | -0.600324 |
| H | -2.248333 | 1.816883  | -1.043915 |
| N | -5.099204 | -1.676645 | -0.077558 |
| C | -6.260573 | -0.891646 | -0.476792 |
| H | -6.303432 | -0.729949 | -1.568161 |
| H | -6.222373 | 0.089991  | 0.001225  |
| C | -7.544803 | -1.562469 | -0.001570 |
| H | -7.568888 | -1.640107 | 1.086973  |
| H | -8.423894 | -1.018321 | -0.350101 |
| N | -7.642455 | -2.974026 | -0.534087 |
| C | -8.904132 | -3.660967 | -0.098799 |
| H | -8.934976 | -4.648616 | -0.558780 |
| H | -9.755509 | -3.063312 | -0.424473 |
| H | -8.892572 | -3.748230 | 0.987819  |
| C | -6.406984 | -3.759068 | -0.152791 |
| H | -6.491525 | -4.746589 | -0.609729 |
| H | -6.422210 | -3.852727 | 0.934888  |
| C | -5.156079 | -3.034368 | -0.627925 |
| H | -4.295320 | -3.614776 | -0.294982 |
| H | -5.128402 | -3.014708 | -1.731620 |
| H | -7.664797 | -2.914799 | -1.559259 |
| C | 1.488780  | -1.182224 | -0.324358 |
| C | 2.722549  | -1.804082 | -0.265276 |
| H | 2.790046  | -2.836007 | -0.588308 |
| H | 0.653753  | -1.740601 | -0.732581 |
| H | 2.388095  | 1.891320  | 0.814710  |
| H | 4.552106  | 0.811698  | 0.933166  |
| C | 5.310548  | -3.070231 | -0.293006 |
| C | 6.780412  | -3.318062 | -0.633693 |
| H | 6.889841  | -4.355279 | -0.969948 |
| H | 7.068348  | -2.660812 | -1.478484 |
| H | 4.728732  | -3.170333 | -1.211539 |
| H | 4.960493  | -3.833207 | 0.421910  |
| H | 5.757968  | -2.085898 | 2.230143  |
| H | 5.938160  | -0.409383 | 1.689588  |
| H | 7.798775  | -0.994068 | 0.214907  |
| H | 8.117577  | -1.565113 | 1.869661  |

(4) **S<sub>0</sub> geometry of PIP-TPE<sub>(bulk)</sub>:**

|   |          |           |           |
|---|----------|-----------|-----------|
| C | 2.255700 | -4.413300 | 11.498100 |
|---|----------|-----------|-----------|

|   |           |            |           |
|---|-----------|------------|-----------|
| C | 3.597200  | -4.683500  | 11.414200 |
| C | 1.751200  | -3.074300  | 11.916000 |
| C | 2.340800  | -2.373600  | 12.983800 |
| C | 1.955600  | -1.092000  | 13.336200 |
| C | 0.934800  | -0.421700  | 12.627100 |
| C | 0.272600  | -1.157500  | 11.626800 |
| C | 0.675500  | -2.444400  | 11.273300 |
| C | 1.223900  | -5.429500  | 11.146800 |
| C | 0.092800  | -5.660700  | 11.950800 |
| C | -0.865900 | -6.610700  | 11.619600 |
| C | -0.758100 | -7.378000  | 10.436100 |
| C | 0.349400  | -7.110000  | 9.602400  |
| C | 1.311500  | -6.173300  | 9.961400  |
| C | -0.361900 | 4.961000   | 13.799800 |
| C | 0.630400  | 1.381100   | 14.264100 |
| C | 0.770400  | 2.894600   | 14.352000 |
| C | -0.273400 | 3.125400   | 12.226200 |
| C | -0.373900 | 1.604700   | 12.080800 |
| C | -4.760100 | -11.020100 | 8.746400  |
| C | -1.562700 | -9.042400  | 8.824300  |
| C | -2.454300 | -10.277000 | 8.743600  |
| C | -3.933700 | -9.420100  | 10.356900 |
| C | -3.088600 | -8.161500  | 10.528800 |
| C | 4.652900  | -3.626400  | 11.486600 |
| C | 4.610600  | -2.486100  | 10.666600 |
| C | 5.584200  | -1.494100  | 10.767000 |
| C | 6.618200  | -1.620200  | 11.695700 |
| C | 6.701300  | -2.766200  | 12.486300 |
| C | 5.738500  | -3.767200  | 12.370900 |
| C | 4.148300  | -6.065200  | 11.270600 |
| C | 3.816000  | -7.084000  | 12.179500 |
| C | 4.406700  | -8.342800  | 12.084700 |
| C | 5.324700  | -8.614400  | 11.068700 |
| C | 5.675600  | -7.610500  | 10.166700 |
| C | 5.103500  | -6.345200  | 10.276800 |
| N | 0.641600  | 0.926800   | 12.877200 |
| N | -0.338200 | 3.517400   | 13.632900 |
| N | -1.697100 | -8.371900  | 10.115900 |
| N | -3.840600 | -9.917600  | 8.993300  |
| H | 3.141300  | -2.844400  | 13.535900 |
| H | 2.483300  | -0.604600  | 14.147400 |
| H | -0.569900 | -0.709300  | 11.122600 |
| H | 0.156300  | -2.958200  | 10.469500 |
| H | -0.037400 | -5.093000  | 12.866500 |
| H | -1.692800 | -6.761600  | 12.303400 |
| H | 0.467700  | -7.617900  | 8.655400  |

|   |           |            |           |
|---|-----------|------------|-----------|
| H | 2.145400  | -5.997900  | 9.290300  |
| H | -1.237400 | 5.376900   | 13.291900 |
| H | -0.434500 | 5.208700   | 14.864200 |
| H | 0.544400  | 5.454200   | 13.398900 |
| H | -0.324000 | 1.086800   | 14.724300 |
| H | 1.435600  | 0.902000   | 14.812600 |
| H | 1.755500  | 3.197000   | 13.948400 |
| H | 0.741100  | 3.204100   | 15.402300 |
| H | -1.111900 | 3.584300   | 11.689200 |
| H | 0.663800  | 3.472400   | 11.750800 |
| H | -0.242100 | 1.347400   | 11.027300 |
| H | -1.385400 | 1.294600   | 12.389400 |
| H | -5.784300 | -10.639500 | 8.796400  |
| H | -4.600900 | -11.408300 | 7.736400  |
| H | -4.651900 | -11.855300 | 9.460900  |
| H | -1.809200 | -8.361100  | 7.990000  |
| H | -0.525600 | -9.358400  | 8.698700  |
| H | -2.089200 | -11.046600 | 9.447900  |
| H | -2.394000 | -10.695800 | 7.740200  |
| H | -4.975800 | -9.165100  | 10.571600 |
| H | -3.613400 | -10.191100 | 11.082000 |
| H | -3.113900 | -7.866700  | 11.576900 |
| H | -3.550500 | -7.350200  | 9.945200  |
| H | 3.793800  | -2.376300  | 9.960400  |
| H | 5.529000  | -0.614800  | 10.133000 |
| H | 7.357900  | -0.837400  | 11.805800 |
| H | 7.512400  | -2.862900  | 13.201800 |
| H | 5.807000  | -4.658300  | 12.988800 |
| H | 3.102600  | -6.875000  | 12.970300 |
| H | 4.176300  | -9.104800  | 12.823600 |
| H | 5.794600  | -9.590700  | 11.001200 |
| H | 6.394700  | -7.819200  | 9.382300  |
| H | 5.389400  | -5.558400  | 9.584900  |

**(5) S<sub>1</sub> of PIP-TPE<sub>(bulk)</sub>.**

a. PL calculation:

Excited State 1: Singlet 2.6320 eV 471.07 nm f=0.4194 <S\*\*2>=0.000

142 ->143 -0.70627

b. Optimized geometry:

|   |           |            |           |
|---|-----------|------------|-----------|
| C | 2.246700  | -4.406100  | 11.486300 |
| C | 3.659300  | -4.675500  | 11.368000 |
| C | 1.760300  | -3.111500  | 11.952900 |
| C | 2.434800  | -2.343900  | 12.943100 |
| C | 2.044100  | -1.064400  | 13.286400 |
| C | 0.956400  | -0.430600  | 12.643600 |
| C | 0.241200  | -1.200100  | 11.700000 |
| C | 0.627400  | -2.488700  | 11.365400 |
| C | 1.248800  | -5.406000  | 11.110700 |
| C | 0.036600  | -5.551100  | 11.839400 |
| C | -0.923800 | -6.488500  | 11.509400 |
| C | -0.755100 | -7.355200  | 10.394200 |
| C | 0.438600  | -7.202100  | 9.645600  |
| C | 1.408500  | -6.284600  | 10.007800 |
| C | -0.350400 | 4.952400   | 13.797000 |
| C | 0.656100  | 1.377700   | 14.269100 |
| C | 0.790300  | 2.891800   | 14.354000 |
| C | -0.268700 | 3.109900   | 12.231100 |
| C | -0.366600 | 1.587800   | 12.094400 |
| C | -4.770000 | -11.003200 | 8.748100  |
| C | -1.558200 | -9.051200  | 8.805400  |
| C | -2.457100 | -10.281400 | 8.749800  |
| C | -3.924300 | -9.413400  | 10.358400 |
| C | -3.083900 | -8.151100  | 10.531400 |
| C | 4.652600  | -3.600000  | 11.346100 |
| C | 4.488100  | -2.395100  | 10.619000 |
| C | 5.427100  | -1.373900  | 10.704200 |
| C | 6.520100  | -1.487600  | 11.567800 |
| C | 6.717000  | -2.673600  | 12.284800 |
| C | 5.816100  | -3.719900  | 12.156700 |
| C | 4.208700  | -6.022300  | 11.307300 |
| C | 3.731100  | -7.114900  | 12.080600 |
| C | 4.325000  | -8.368300  | 11.973100 |
| C | 5.343600  | -8.608200  | 11.046400 |
| C | 5.807700  | -7.553300  | 10.247100 |
| C | 5.269500  | -6.286800  | 10.391400 |
| N | 0.660100  | 0.920700   | 12.883500 |
| N | -0.323900 | 3.508100   | 13.636700 |
| N | -1.703500 | -8.322300  | 10.066900 |
| N | -3.839800 | -9.908000  | 8.994300  |
| H | 3.285000  | -2.782700  | 13.445200 |
| H | 2.622300  | -0.535400  | 14.036200 |
| H | -0.622100 | -0.765400  | 11.216700 |
| H | 0.076500  | -3.017700  | 10.594500 |
| H | -0.129700 | -4.920700  | 12.706400 |
| H | -1.799700 | -6.563600  | 12.141200 |

|   |           |            |           |
|---|-----------|------------|-----------|
| H | 0.609800  | -7.791200  | 8.757000  |
| H | 2.297900  | -6.191400  | 9.397100  |
| H | -1.229300 | 5.364200   | 13.291400 |
| H | -0.418400 | 5.204800   | 14.860700 |
| H | 0.552600  | 5.446500   | 13.389400 |
| H | -0.296100 | 1.080400   | 14.733000 |
| H | 1.463800  | 0.895100   | 14.811700 |
| H | 1.772600  | 3.198200   | 13.947000 |
| H | 0.761600  | 3.203600   | 15.403700 |
| H | -1.112800 | 3.564700   | 11.699100 |
| H | 0.663700  | 3.456900   | 11.746600 |
| H | -0.246400 | 1.321200   | 11.041500 |
| H | -1.374500 | 1.278100   | 12.417000 |
| H | -5.790300 | -10.613000 | 8.797800  |
| H | -4.613800 | -11.393300 | 7.738500  |
| H | -4.668100 | -11.838100 | 9.463600  |
| H | -1.786900 | -8.392400  | 7.950500  |
| H | -0.523000 | -9.378200  | 8.704900  |
| H | -2.097400 | -11.042100 | 9.466300  |
| H | -2.396700 | -10.717000 | 7.753700  |
| H | -4.964100 | -9.158000  | 10.582300 |
| H | -3.599700 | -10.186000 | 11.079900 |
| H | -3.076300 | -7.885600  | 11.588100 |
| H | -3.570300 | -7.328200  | 9.987300  |
| H | 3.624900  | -2.291600  | 9.970800  |
| H | 5.302400  | -0.473800  | 10.110100 |
| H | 7.209100  | -0.663400  | 11.695800 |
| H | 7.565500  | -2.758800  | 12.958300 |
| H | 5.956300  | -4.630200  | 12.731500 |
| H | 2.950300  | -6.941200  | 12.814100 |
| H | 4.025900  | -9.164800  | 12.646400 |
| H | 5.796900  | -9.590900  | 10.968700 |
| H | 6.585400  | -7.730500  | 9.511800  |
| H | 5.627800  | -5.473700  | 9.768300  |

### References:

- [1] A. D. Becke, *J. Chem. Phys.*, 1993, **98**, 5648-5652.
- [2] C. Lee, W. Yang and R.G. Parr, *Phys. Rev. B*, 1988, **37**, 785-789.
- [3] S. H. Vosko, L. Wilk and M. Nusair, *Can. J. Phys.*, 1980, **58**, 1200-1211.
- [4] P. J. Stephens, F. J. Devlin, C. F. Chabalowski and M. J. Frisch, *J. Phys. Chem.*, 1994, **98**, 11623-11627.
- [5] M. J. Frisch, G. W. Trucks, H. B. Schlegel, G. E. Scuseria, M. A. Robb, J. R. Cheeseman, G. Scalmani, V. Barone, B. Mennucci, G. A. Petersson, H. Nakatsuji, M. Caricato, X. Li, H. P. Hratchian, A. F. Izmaylov, J. Bloino, G. Zheng, J. L. Sonnenberg, M. Hada, M. Ehara, K. Toyota, R. Fukuda, J. Hasegawa, M. Ishida, T. Nakajima, Y. Honda, O. Kitao, H. Nakai, T. Vreven, J. A.

Montgomery, Jr., J. E. Peralta, F. Ogliaro, M. Bearpark, J. J. Heyd, E. Brothers, K. N. Kudin, V. N. Staroverov, T. Keith, R. Kobayashi, J. Normand, K. Raghavachari, A. Rendell, J. C. Burant, S. S. Iyengar, J. Tomasi, M. Cossi, N. Rega, J. M. Millam, M. Klene, J. E. Knox, J. B. Cross, V. Bakken, C. Adamo, J. Jaramillo, R. Gomperts, R. E. Stratmann, O. Yazyev, A. J. Austin, R. Cammi, C. Pomelli, J. W. Ochterski, R. L. Martin, K. Morokuma, V. G. Zakrzewski, G. A. Voth, P. Salvador, J. J. Dannenberg, S. Dapprich, A. D. Daniels, O. Farkas, J. B. Foresman, J. V. Ortiz, J. Cioslowski and D. J. Fox. *EM64L-Gaussian 09, Revision D.01*. Gaussian, Inc., Wallingford CT, 2013.

[6] J. Tomasi, B. Mennucci and R. Cammi, Quantum Mechanical Continuum Solvation Models. *Chem. Rev.*, 2005, **105**, 2999-3094.

[7] S. Grimme, *J Comput. Chem.*, 2004, **25**, 1463-1473.

[8] F. Maseras and K. Morokuma, *J. Comput. Chem.*, 1995, **16**, 1170-1179.

[9] M. Svensson, S. Humbel, R. D. J. Froese, T. Matsubara, S. Sieber and K. Morokuma, *J. Phys. Chem.*, 1996, **100**, 19357-19363.

[10] S. Dapprich, I. Komáromi, K. S. Byun, K. Morokuma and M. J. Frisch, *J. Mol. Struct. (THEOCHEM)*, 1999, **461**, 1-23.

[11] T. Vreven, K. S. Byun, I. Komáromi, S. Dapprich, J. A. Jr. Montgomery, K. Morokuma and M. J. Frisch, *J. Chem. Theory Comput.*, 2006, **2**, 815-826.

[12] A. D. Becke, *J. Chem. Phys.*, 1993, **98**, 5648-5652.

[13] A. K. Rappe, C. J. Casewit, K. S. Colwell, W. A. GoddardIII and W. A. Skiff, *J. Am. Chem. Soc.*, 1992, **114**, 10024-10035.

[14] D. Bakowies and W. Thiel, *J. Phys. Chem.*, 1996, **100**, 10580-10594.

[15] Q. Y. Wu, C. M. Deng, Q. Peng, Y. L. Niu and Z. G. Shuai, Quantum Chemical Insights into the Aggregation Induced Emission Phenomena: A QM/MM Study for Pyrazine Derivatives. *J. Comput. Chem.*, 2012, **33**, 1862-1869.

[16] Q. Y. Wu, T. Zhang, Q. Peng, D. Wang and Z. G. Shuai, Aggregation Induced Blue-Shifted Emission-the Molecular Picture from a QM/MM Study. *Phys. Chem. Chem. Phys.*, 2014, **16**, 5545-5552.
